# Supplementary material for: Copper(ii) complexes with a new carboxylic-functionalized arylhydrazone of β-diketone as effective catalysts for acid-free oxidations
Source: Royal Society of Chemistry journal article supplement (doi:10.1039/c2nj40210f), 2012-01-01
Supplement: c2nj40210f.pdf [file c2nj40210f.pdf]

# Electronic Supplementary Material

## Copper(II) complexes with a new carboxylic-functionalized arylhydrazone of $\beta$ -diketone as effective catalysts for acid-free oxidations

Maximilian N. Kopylovich,<sup>a</sup> Malgorzata J. Gajewska,<sup>a</sup> Kamran T. Mahmudov,<sup>a,b</sup>  
Marina V. Kirillova,<sup>a</sup> Paweł J. Figiel,<sup>a</sup> M. Fátima C. Guedes da Silva,<sup>a,c</sup>  
Beatriz Gil-Hernández,<sup>d</sup> Joaquin Sanchiz,<sup>d</sup> Armando J. L. Pombeiro,<sup>\*a</sup>

<sup>a</sup> Centro de Química Estrutural, Complexo I, Instituto Superior Técnico, Technical University of Lisbon, Av. Rovisco Pais, 1049–001 Lisbon, Portugal

<sup>b</sup> Baku State University, Department of Chemistry, Z. Xalilov Str. 23, Az 1148 Baku, Azerbaijan

<sup>c</sup> Universidade Lusófona de Humanidades e Tecnologias, ULHT Lisbon, Campo Grande 376, 1749-024 Lisbon, Portugal.

<sup>d</sup> Departamento de Química Inorgánica, Universidad de La Laguna, 38200 La Laguna, Tenerife, Spain.

---

\*Corresponding author. Phone: +351 218419237, Fax: (+1)-21-846-4455, E-mail: [pombeiro@ist.utl.pt](mailto:pombeiro@ist.utl.pt)

## X-ray structure determination

**Table S1.** Crystal data and structure refinement details for **2** and **3**.

|                                                                                         | <b>2</b>                                                                       | <b>3</b>                                                                       |
|-----------------------------------------------------------------------------------------|--------------------------------------------------------------------------------|--------------------------------------------------------------------------------|
| Formula unit                                                                            | C <sub>30</sub> H <sub>38</sub> Cu <sub>2</sub> N <sub>6</sub> O <sub>14</sub> | C <sub>26</sub> H <sub>28</sub> Cu <sub>2</sub> N <sub>4</sub> O <sub>12</sub> |
| Formula weight                                                                          | 833.74                                                                         | 715.60                                                                         |
| Crystal system                                                                          | Triclinic                                                                      | Triclinic                                                                      |
| Space group                                                                             | <i>P</i> -1(No2)                                                               | <i>P</i> -1                                                                    |
| <i>a</i> (Å)                                                                            | 8.6358(2)                                                                      | 9.1371(14)                                                                     |
| <i>b</i> (Å)                                                                            | 10.3215(2)                                                                     | 9.2116(15)                                                                     |
| <i>c</i> (Å)                                                                            | 10.8552(3)                                                                     | 10.2632(17)                                                                    |
| $\alpha$ (°)                                                                            | 85.894(10)                                                                     | 63.521(8)                                                                      |
| $\beta$ (°)                                                                             | 71.985(2)                                                                      | 68.961(7)                                                                      |
| $\gamma$ (°)                                                                            | 66.5280(10)                                                                    | 72.657(7)                                                                      |
| <i>Z</i>                                                                                | 1                                                                              | 1                                                                              |
| Volume (Å <sup>3</sup> )                                                                | 842.52(4)                                                                      | 711.7(2)                                                                       |
| <i>D</i> <sub>c</sub> (g cm <sup>-3</sup> )                                             | 1.643                                                                          | 1.670                                                                          |
| $\mu$ (mm <sup>-1</sup> )                                                               | 1.341                                                                          | 1.566                                                                          |
| <i>F</i> (000)                                                                          | 430                                                                            | 366                                                                            |
| Rfl collected/unique/obs                                                                | 15771/3088/2867                                                                | 8859/ 2876/ 1902                                                               |
| R <sub>int</sub>                                                                        | 0.0291                                                                         | 0.0513                                                                         |
| R <sub>1</sub> <sup>a</sup> , wR <sub>2</sub> <sup>b</sup> [ <i>I</i> > 2σ( <i>I</i> )] | 0.0250, 0.0689                                                                 | 0.0442, 0.1041                                                                 |
| R <sub>1</sub> , wR <sub>2</sub> (all data)                                             | 0.0280, 0.0716                                                                 | 0.0896, 0.1243                                                                 |
| GOF on <i>F</i> <sup>2</sup>                                                            | 0.973                                                                          | 0.976                                                                          |
| Min. and Max. resd. dens. [e/ Å <sup>3</sup> ]                                          | -0.347, 0.394                                                                  | -0.621, 0.472                                                                  |

<sup>a</sup> R1 =  $\Sigma||F_o| - |F_c||/\Sigma|F_o|$ . <sup>b</sup> wR2 =  $[\Sigma[w(F_o^2 - F_c^2)^2]/\Sigma[w(F_o^2)^2]]^{1/2}$

## Cyclohexane Oxidation

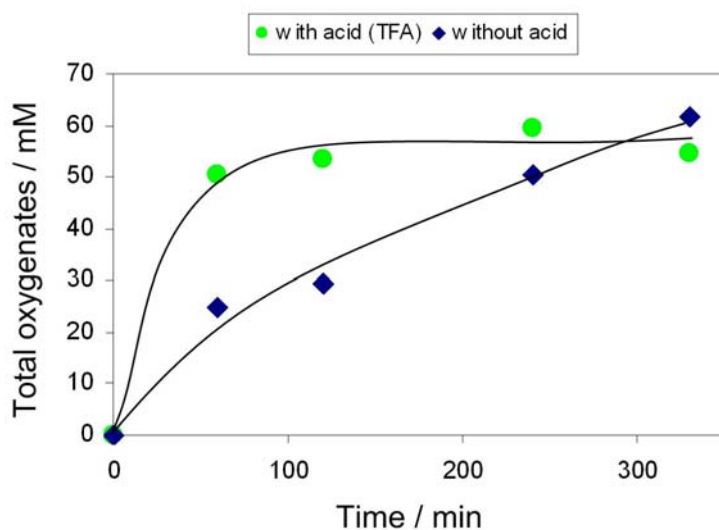

**Figure S1.** Accumulation of oxygenates [total concentration, mM ( $\text{mmol} \cdot \text{L}^{-1}$ ), of cyclohexanol and cyclohexanone, after treatment with  $\text{PPh}_3$ ] along the time in the oxidation of cyclohexane by  $\text{H}_2\text{O}_2$ , catalyzed by complex **2** in the presence and in the absence of acid (TFA) additive. Reaction conditions:  $[\mathbf{2}]_0 = 30 \times 10^{-4} \text{ mol} \cdot \text{L}^{-1}$ ,  $[\text{TFA}]_0 = 0.01 \text{ mol} \cdot \text{L}^{-1}$ ,  $[\text{Total H}_2\text{O}]_0 = 4.2 \text{ mol} \cdot \text{L}^{-1}$ ,  $[\text{H}_2\text{O}_2]_0 = 2.2 \text{ mol} \cdot \text{L}^{-1}$  (50 % aqueous),  $[\text{cyclohexane}]_0 = 0.46 \text{ mol} \cdot \text{L}^{-1}$ , MeCN up to 5 mL total volume, 50 °C.

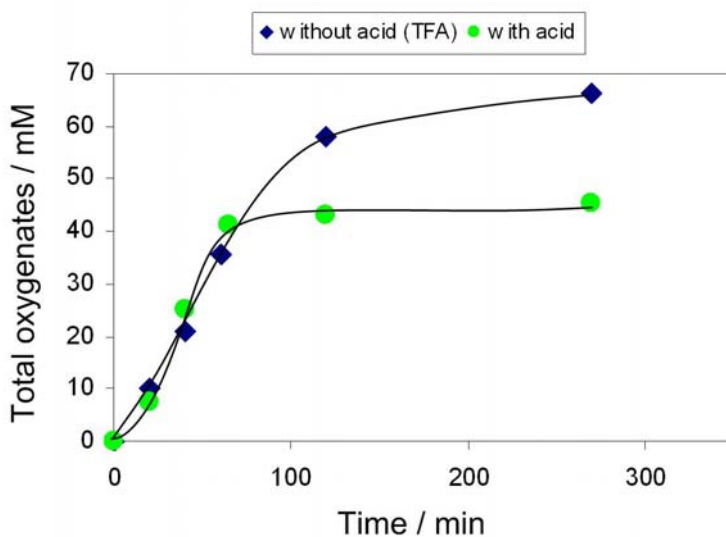

**Figure S2.** Accumulation of oxygenates [total concentration, mM ( $\text{mmol} \cdot \text{L}^{-1}$ ), of cyclohexanol and cyclohexanone, after treatment with  $\text{PPh}_3$ ] along the time in the oxidation of cyclohexane by  $\text{H}_2\text{O}_2$ , catalyzed by complex **3** in the presence and in the absence of acid (TFA) additive. Reaction conditions:  $[\mathbf{3}]_0 = 5 \times 10^{-4} \text{ mol} \cdot \text{L}^{-1}$ ,  $[\text{Total H}_2\text{O}]_0 = 4.2 \text{ mol} \cdot \text{L}^{-1}$ ,  $[\text{H}_2\text{O}_2]_0 = 2.2 \text{ mol} \cdot \text{L}^{-1}$  (50 % aqueous),  $[\text{cyclohexane}]_0 = 0.46 \text{ mol} \cdot \text{L}^{-1}$ , MeCN up to 5 mL total volume, 50 °C.

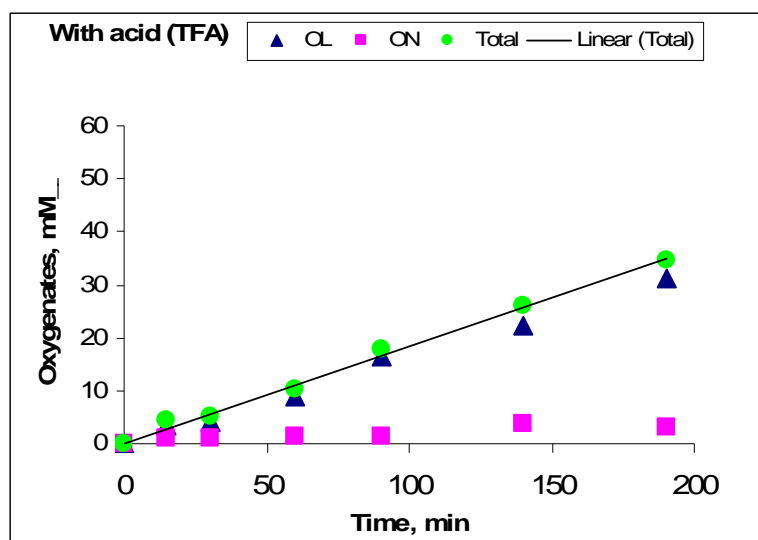

**Figure S3.** Accumulation of oxygenates [concentrations, mM ( $\text{mmol} \cdot \text{L}^{-1}$ ), of cyclohexanol (OL) and cyclohexanone (ON), after treatment with  $\text{PPh}_3$ ] along the time in the oxidation of cyclohexane by  $\text{H}_2\text{O}_2$ , catalyzed by complex **2** in the presence of acid (TFA) additive. Reaction conditions:  $[\mathbf{2}]_0 = 30 \times 10^{-5} \text{ M}$ ,  $[\text{TFA}]_0 = 0.0035 \text{ mol} \cdot \text{L}^{-1}$ ,  $[\text{Total H}_2\text{O}]_0 = 6.4 \text{ mol} \cdot \text{L}^{-1}$ ,  $[\text{H}_2\text{O}_2]_0 = 2.2 \text{ mol} \cdot \text{L}^{-1}$  (50 % aqueous),  $[\text{cyclohexane}]_0 = 0.46 \text{ mol} \cdot \text{L}^{-1}$ , MeCN up to 5 mL total volume, 50 °C.

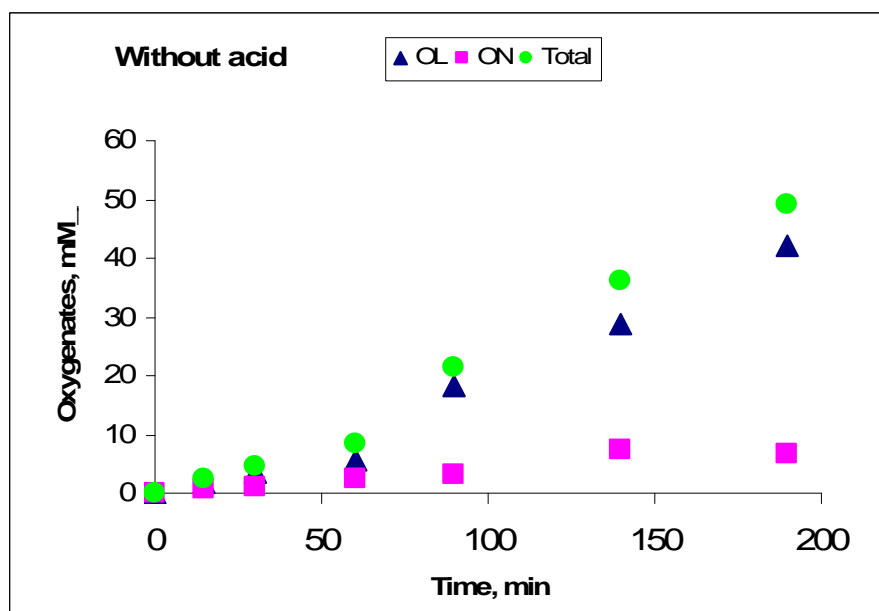

**Figure S4.** Accumulation of oxygenates [concentrations, mM ( $\text{mmol} \cdot \text{L}^{-1}$ ), of cyclohexanol (OL) and cyclohexanone (ON), after treatment with  $\text{PPh}_3$ ] along the time in the oxidation of cyclohexane by  $\text{H}_2\text{O}_2$ , catalyzed by complex **2** in the absence of acid additive. Reaction conditions:  $[\mathbf{2}]_0 = 30 \times 10^{-5} \text{ mol} \cdot \text{L}^{-1}$ ,  $[\text{Total H}_2\text{O}]_0 = 6.4 \text{ mol} \cdot \text{L}^{-1}$ ,  $[\text{H}_2\text{O}_2]_0 = 2.2 \text{ mol} \cdot \text{L}^{-1}$  (50 % aqueous),  $[\text{cyclohexane}]_0 = 0.46 \text{ mol} \cdot \text{L}^{-1}$ , MeCN up to 5 mL total volume, 50 °C.

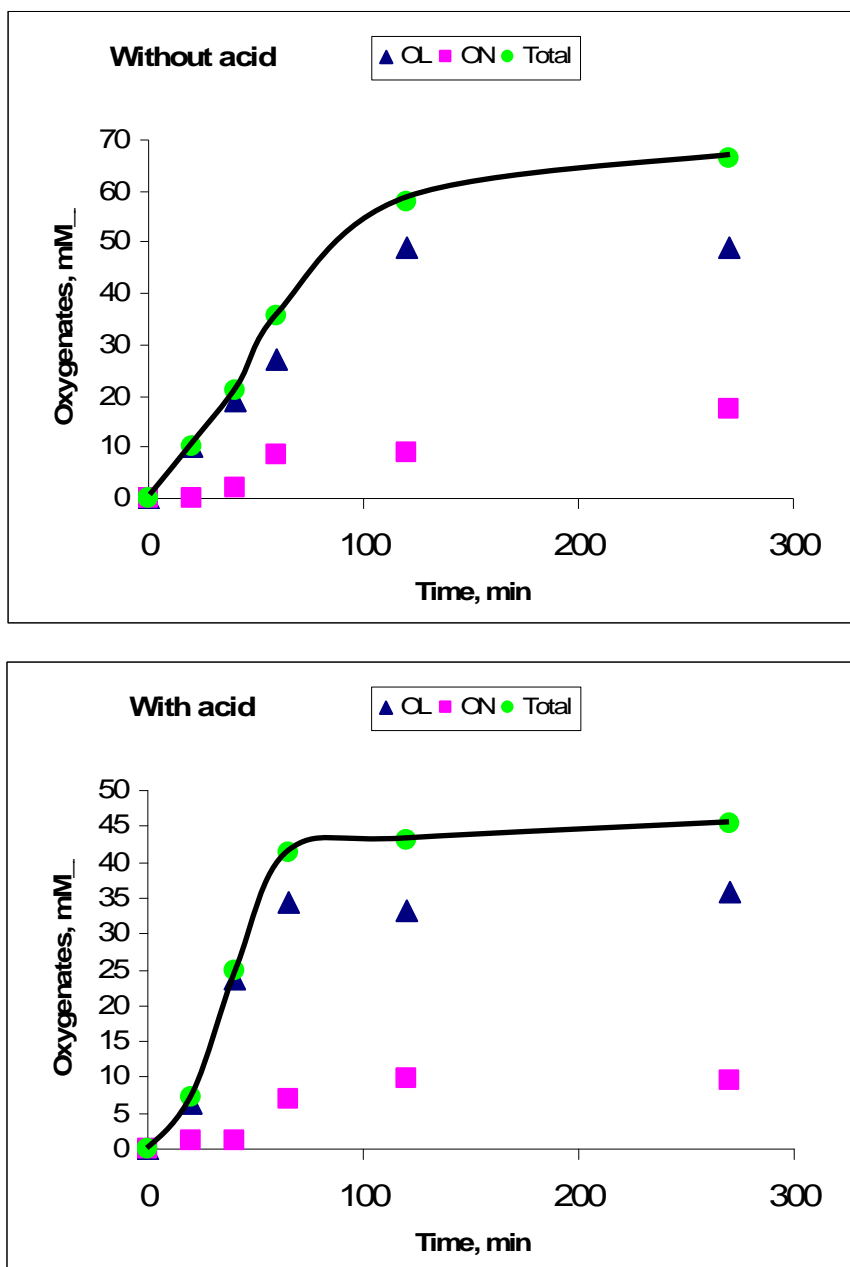

**Figure S5.** Accumulation of oxygenates [concentrations, mM ( $\text{mmol} \cdot \text{L}^{-1}$ ), of cyclohexanol (OL) and cyclohexanone (ON), after treatment with  $\text{PPh}_3$ ] along the time in the oxidation of cyclohexane by  $\text{H}_2\text{O}_2$ , catalyzed by complex **3** in the absence (top) or in the presence (down) of TFA additive. Reaction conditions:  $[\mathbf{3}]_0 = 5 \times 10^{-4} \text{ mol} \cdot \text{L}^{-1}$ ,  $[\text{Total H}_2\text{O}]_0 = 4.2 \text{ mol} \cdot \text{L}^{-1}$ ,  $[\text{H}_2\text{O}_2]_0 = 2.2 \text{ mol} \cdot \text{L}^{-1}$  (50 % aqueous),  $[\text{cyclohexane}]_0 = 0.46 \text{ mol} \cdot \text{L}^{-1}$ , MeCN up to 5 mL total volume, 50 °C.
